# Supplementary material
Source: ML conference proceedings conference paper supplement (https://openaccess.thecvf.com/content/CVPR2024/html/Wang_ODCR_Orthogonal_Decoupling_CVPR_2024_paper.html)
Supplement: Supplementary file [file Wang_ODCR_Orthogonal_Decoupling_CVPR_2024_supplemental.pdf]

# Supplementary Material of "ODCR: Orthogonal Decoupling Contrastive Regularization for Unpaired Image Dehazing"

Anonymous CVPR submission

Paper ID 909

## 001 A. Implementation Details

002 We follow the setting of CUT [4], except that the PatchNCE  
003 loss is replaced by our Weighted PatchNCE (WPNCE). In  
004 detail, we use a 9-block Resnet-based generator [2] with  
005 PatchGAN [1]. We define our encoder as the first half of the  
006 generator, and accordingly extract our multilayer features  
007 from five evenly distributed points of the encoder. For the  
008 O-MLPs, we set their numbers of layers to 2 with 256 units  
009 in each layer and  $\tau$  to 0.07.

010 We train our full model for 400 epochs, keeping the  
011 learning rate at  $2e^{-4}$  for the first 200 epochs, and linearly  
012 decay the learning rate in the last 200 epochs. Each sub-  
013 net of the network is optimized by the Adam optimizer [3]  
014 ( $\beta_1 = 0.5, \beta_2 = 0.999$ ). The samples are randomly cropped  
015 into patches of size  $256 \times 256$  during training.

## 016 B. Proofs of Theorems

017 **Theorem 1.** Given  $\nabla f(\cdot)$  in Euclidean space and  $grad f(\cdot)$   
018 defined as follows:

$$019 grad f(\Theta) = \nabla f(\Theta) - \frac{1}{2}\Theta\Theta^T\nabla f(\Theta) - \frac{1}{2}\Theta\nabla f(\Theta)^T\Theta \quad (1)$$

020  $grad f(\Theta)$  is the orthogonal projection of  $\nabla f(\Theta)$  onto the  
021 tangent space of the Stiefel manifold.

022 **Proof 1.** If  $grad f(\cdot)$  is the orthogonal projection of  $\nabla f(\cdot)$   
023 onto the tangent space of the Stiefel manifold, according to  
024 the triangle law of vector addition, we have:

$$025 \langle (grad f(\cdot) - \nabla f(\cdot)), grad f(\cdot) \rangle = 0 \quad (2)$$

026 where  $\langle \cdot, \cdot \rangle$  is the inner product. In particular, for  $Z_1, Z_2$  on  
027 the Stiefel manifold:

$$028 \langle Z_1, Z_2 \rangle = tr(Z_1^T Z_2^T) \quad (3)$$

029 By substituting Eq. 1 and 3 into the left-hand side of Eq.

2, we obtain:

$$\begin{aligned} & \langle (grad f(\Theta) - \nabla f(\Theta)), grad f(\Theta) \rangle \\ &= tr\left(\frac{1}{2}\nabla f(\Theta)^T\Theta\Theta^T\nabla f(\Theta) - \frac{1}{4}\nabla f(\Theta)^T\Theta\Theta^T\Theta\Theta^T\nabla f(\Theta)\right. \\ & \quad \left.- \frac{1}{4}\nabla f(\Theta)^T\Theta\Theta^T\Theta\nabla f(\Theta)^T\Theta + \frac{1}{2}\Theta^T\nabla f(\Theta)\Theta^T\nabla f(\Theta)\right) \\ & \quad \left.- \frac{1}{4}\Theta^T\nabla f(\Theta)\Theta^T\Theta\Theta^T\nabla f(\Theta) - \frac{1}{4}\Theta^T\nabla f(\Theta)\Theta^T\Theta\nabla f(\Theta)^T\Theta\right) \end{aligned} \quad (4)$$

Due to  $\Theta \in St(p, n)$ ,  $\Theta$  satisfies  $\Theta^T\Theta = I$ . Then Eq. 4  
can be simplified as:

$$\begin{aligned} & \langle (grad f(\Theta) - \nabla f(\Theta)), grad f(\Theta) \rangle \\ &= \frac{1}{4}tr(\nabla f(\Theta)^T\Theta\Theta^T\nabla f(\Theta)) - \frac{1}{4}tr(\nabla f(\Theta)^T\Theta\nabla f(\Theta)^T\Theta) \quad (5) \\ & \quad + \frac{1}{4}tr(\Theta^T\nabla f(\Theta)\Theta^T\nabla f(\Theta)) - \frac{1}{4}tr(\Theta^T\nabla f(\Theta)\nabla f(\Theta)^T\Theta) \end{aligned} \quad (5)$$

Due to  $tr(AB) = tr(BA)$  and  $tr(A) = tr(A^T)$ , we have

$$tr(\nabla f(\Theta)^T\Theta\Theta^T\nabla f(\Theta)) = tr(\Theta^T\nabla f(\Theta)\nabla f(\Theta)^T\Theta) \quad (6)$$

and

$$tr(\Theta^T\nabla f(\Theta)\Theta^T\nabla f(\Theta)) = tr(\nabla f(\Theta)^T\Theta\nabla f(\Theta)^T\Theta) \quad (7)$$

So Eq. 5 equals to 0, demonstrating  $grad f(\Theta)$  is the ortho-  
gonal projection of  $\nabla f(\Theta)$ . Furthermore, it can also  
prove that  $\Theta^T grad f(\Theta) + grad f(\Theta)^T f(\Theta) = 0$ , which  
means that  $grad f(\Theta)$  is on the tangent space.

**Theorem 2.** Given a point  $\Xi = \Theta - \gamma grad f(\Theta)$  on the tan-  
gent space  $T_\Theta St(p, n)$  of a point on a Stiefel manifold, let  
retraction operation be  $\mathfrak{R}_\Theta(\Xi) = (\Theta + \Xi)(I + \Xi^T\Xi)^{-\frac{1}{2}}$ , the  
point  $\Xi$  after retraction operation satisfies orthogonal con-  
straint:

$$\mathfrak{R}_\Theta(\Xi)^T \mathfrak{R}_\Theta(\Xi) = I \quad (8)$$

i.e.,  $\mathfrak{R}_\Theta(\Xi)$  is on  $St(p, n)$ .

**Proof 2.** The parameter after retraction  $\mathfrak{R}_\Theta$  satisfies:

$$\mathfrak{R}_\Theta(\Xi)^T \mathfrak{R}_\Theta(\Xi) = (I + \Xi^T\Xi)^{-\frac{1}{2}}((\Theta + \Xi)^T(\Theta + \Xi))(I + \Xi^T\Xi)^{-\frac{1}{2}} \quad (9)$$

For  $\Xi$  on the tangent space  $T_\Theta St(p, n)$ ,  $\Xi$  satisfies:

$$\Theta^T\Xi + \Xi^T\Theta = 0 \quad (10)$$

054 So

$$\mathfrak{R}_\Theta(\Xi)^T \mathfrak{R}_\Theta(\Xi) = (I + \Xi^T \Xi)^{-\frac{1}{2}} (I + \Xi^T \Xi) (I + \Xi^T \Xi)^{-\frac{1}{2}} \quad (11)$$

055 where  $(I + \Xi^T \Xi) \in \mathbb{R}^{p \times p}$ . Eigenvalue decomposition of  
056  $(I + \Xi^T \Xi)$  can get:  
057

$$058 \quad (I + \Xi^T \Xi) = PAP^{-1} \quad (12)$$

059 where  $A$  stands for a diagonal matrix, and  $P^T P = I$ . Sub-  
060 sequently, we have:

$$\begin{aligned} \mathfrak{R}_\Theta(\Xi)^T \mathfrak{R}_\Theta(\Xi) &= P\Lambda^{-\frac{1}{2}} P^T P\Lambda P^T P\Lambda^{-\frac{1}{2}} P^T \\ &= P\Lambda^{-\frac{1}{2}} \Lambda \Lambda^{-\frac{1}{2}} P^T \\ &= PP^T \\ &= I \end{aligned} \quad (13)$$

062 Thus  $\mathfrak{R}_\Theta(\Xi)$  satisfies the orthogonal constraint.

## 063 References

- 064 [1] Phillip Isola, Jun-Yan Zhu, Tinghui Zhou, and Alexei A Efros.  
065 Image-to-image translation with conditional adversarial net-  
066 works. In *Proceedings of the IEEE conference on computer*  
067 *vision and pattern recognition*, pages 1125–1134, 2017. 1
- 068 [2] Justin Johnson, Alexandre Alahi, and Li Fei-Fei. Perceptual  
069 losses for real-time style transfer and super-resolution. In  
070 *Computer Vision–ECCV 2016: 14th European Conference,*  
071 *Amsterdam, The Netherlands, October 11–14, 2016, Proceed-*  
072 *ings, Part II 14*, pages 694–711. Springer, 2016. 1
- 073 [3] Diederik P Kingma and Jimmy Ba. Adam: A method for  
074 stochastic optimization. *arXiv preprint arXiv:1412.6980*,  
075 2014. 1
- 076 [4] Taesung Park, Alexei A Efros, Richard Zhang, and Jun-Yan  
077 Zhu. Contrastive learning for unpaired image-to-image trans-  
078 lation. In *Computer Vision–ECCV 2020: 16th European Con-*  
079 *ference, Glasgow, UK, August 23–28, 2020, Proceedings, Part*  
080 *IX 16*, pages 319–345. Springer, 2020. 1
